# Supplementary material
Source: MDPI journal article supplement (https://www.mdpi.com/2079-9276/12/9/107)
Supplement: s1 [file s1]

Supplementary Materials

# How Do Extreme Lake Water Temperatures in Poland Respond to Climate Change?

**Table S1.** Average and median Sen's slope value of minimum lake water temperature for all analysed lakes.

| Period    | Value   | Nov     | Dec    | Jan    | Feb    | Mar    | Apr    | May    | Jun   | Jul    | Aug   | Sep    | Oct    |
|-----------|---------|---------|--------|--------|--------|--------|--------|--------|-------|--------|-------|--------|--------|
| 1972–2001 | Average | 0.17b*  | 0.11b  | 0.12a  | 0.15a  | 0.26a  | 0.27b  | 1.19   | 0.76a | 0.69a  | 0.70a | 0.17   | 0.43ab |
|           | Median  | 0.14    | 0.12b  | 0.16ab | 0.11a  | 0.27a  | 0.36b  | 1.24   | 0.74a | 0.69ab | 0.67a | 0.10ab | 0.50ab |
| 1982–2011 | Average | 0.37ac  | 0.18ab | −0.03a | −0.04  | 0.05   | 0.24b  | 0.57ab | 0.74a | 0.68a  | 0.58a | 0.63a  | 0.63ab |
|           | Median  | 0.37ab  | 0.09ab | −0.05a | −0.01b | 0.04b  | 0.11ab | 0.52ab | 0.66a | 0.71ac | 0.57a | 0.68ac | 0.72ac |
| 1992–2021 | Average | 0.38abc | 0.79   | 0.42   | 0.08a  | 0.25a  | 0.46ab | 0.41b  | 0.36  | 0.46a  | 0.61a | 0.57a  | 0.69b  |
|           | Median  | 0.09ab  | 0.88   | 0.45b  | 0.08ab | 0.20ab | 0.42ab | 0.54b  | 0.36a | 0.39bc | 0.67a | 0.57bc | 0.65bc |
| 1972–2021 | Average | 0.47a   | 0.30a  | 0.06a  | 0.11a  | 0.22a  | 0.45a  | 0.77a  | 0.63a | 0.58a  | 0.59a | 0.41   | 0.43a  |
|           | Median  | 0.46b   | 0.32a  | 0.06a  | 0.10a  | 0.22a  | 0.39a  | 0.76a  | 0.62a | 0.57a  | 0.56a | 0.43a  | 0.42a  |

\*-the same letter indicates no significant differences at the significance level of 0.05 (mean and median value are analysed separately). The results of the t-test and the sign test are presented on the background of average and median values respectively.

**Table S2.** Average and median Sen's slope value of maximum lake water temperature for all analysed lakes.

| Period    | Value   | Nov    | Dec    | Jan   | Feb    | Mar    | Apr    | May    | Jun   | Jul    | Aug   | Sep    | Oct   |
|-----------|---------|--------|--------|-------|--------|--------|--------|--------|-------|--------|-------|--------|-------|
| 1972–2001 | Average | 0.22a* | 0.07   | 0.28a | 0.46   | 0.04   | 1.10b  | 0.59   | 0.06  | 0.43   | 0.46a | 0.17   | 0.19  |
|           | Median  | 0.28a  | 0.06ab | 0.25a | 0.43b  | 0.11b  | 1.11a  | 0.72a  | 0.09  | 0.35a  | 0.46a | 0.11ab | 0.13a |
| 1982–2011 | Average | 0.25a  | 0.33a  | −0.16 | 0.15a  | 0.36a  | 0.83ab | −0.02a | 0.47a | 0.64ab | 0.52a | 0.44a  | 0.63a |
|           | Median  | 0.32a  | 0.35ac | −0.20 | 0.07a  | 0.32ab | 0.79a  | 0.03b  | 0.42a | 0.62ab | 0.54a | 0.49a  | 0.68b |
| 1992–2021 | Average | 0.70   | 0.59   | 0.31a | 0.16a  | 0.56   | 0.30   | 0.03a  | 0.95  | 0.90b  | 0.56a | 0.77   | 0.61a |
|           | Median  | 0.70   | 0.62bc | 0.43a | 0.16ab | 0.60ab | 0.37   | 0.00ab | 0.97  | 0.88b  | 0.47a | 0.86b  | 0.63b |
| 1972–2021 | Average | 0.41   | 0.29a  | 0.25a | 0.23a  | 0.36a  | 0.82a  | 0.37   | 0.44a | 0.62a  | 0.57a | 0.43a  | 0.34  |
|           | Median  | 0.40a  | 0.33a  | 0.25a | 0.21a  | 0.34a  | 0.83a  | 0.39   | 0.44a | 0.64a  | 0.56a | 0.45a  | 0.35a |

\*-the same letter indicates no significant differences at the significance level of 0.05 (mean and median value are analysed separately). The results of the t-test and the sign test are presented on the background of average and median values respectively.

**Table S3.** Mann-Kendall and Sen slope analysis of mean yearly air temperature (°C per decade).

| Meteorological station | Code | 1972–2021 |         | 1972–2001 |         | 1982–2011 |         | 1992–2021 |         |
|------------------------|------|-----------|---------|-----------|---------|-----------|---------|-----------|---------|
|                        |      | Z-Value   | P-Value | Z-Value   | P-Value | Z-Value   | P-Value | Z-Value   | P-Value |
| Zielona Góra           | A    | 4.31      | 0.000*  | 1.97      | 0.049*  | 2.12      | 0.034*  | 2.87      | 0.004*  |
| Chojnice               | B    | 4.68      | 0.000*  | 1.86      | 0.063   | 1.86      | 0.063   | 3.36      | 0.001*  |
| Łeba                   | C    | 4.16      | 0.000*  | 1.63      | 0.103   | 0.62      | 0.536   | 3.43      | 0.001*  |
| Toruń                  | D    | 3.89      | 0.000*  | 1.82      | 0.069   | 0.62      | 0.536   | 2.49      | 0.013*  |
| Kętrzyn                | E    | 3.87      | 0.000*  | 1.14      | 0.253   | 1.29      | 0.196   | 3.40      | 0.001*  |
| Olsztyn                | F    | 3.87      | 0.000*  | 1.63      | 0.103   | 0.43      | 0.666   | 3.13      | 0.002*  |

\* 5% significance level.
